# Supplementary material for: Investigation of Antimicrobial Effects of Polydopamine-Based Composite Coatings
Source: MDPI journal article supplement (doi:10.3390/molecules28114258), 2023-05-23
Supplement: s1 [file s1]

# Investigation of Antimicrobial Effects of Polydopamine Based Composite Coatings

Rahila Batul<sup>1,2</sup>, Mrinal Bhawe<sup>1</sup> and Aimin Yu<sup>1\*</sup>

<sup>1</sup>Department of Chemistry and Biotechnology, School of Science, Computing & Engineering Technologies, Swinburne University of Technology, Hawthorn, VIC 3122, Australia

<sup>2</sup>Department of Pharmacology and Toxicology, College of Pharmacy, University of Ha'il, City of Ha'il, 55211, Saudi Arabia

## Supplementary Information

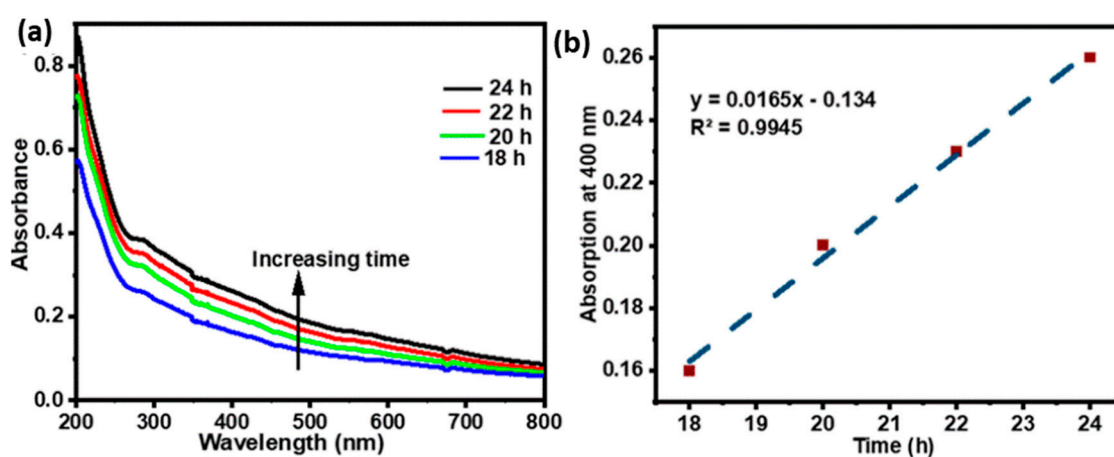

**Figure S1:** (a) UV-Visible spectra of PDA coated quartz slides at variable timings; and (b) Linear relationship of the absorbance of PDA coating with respect to polymerization time.

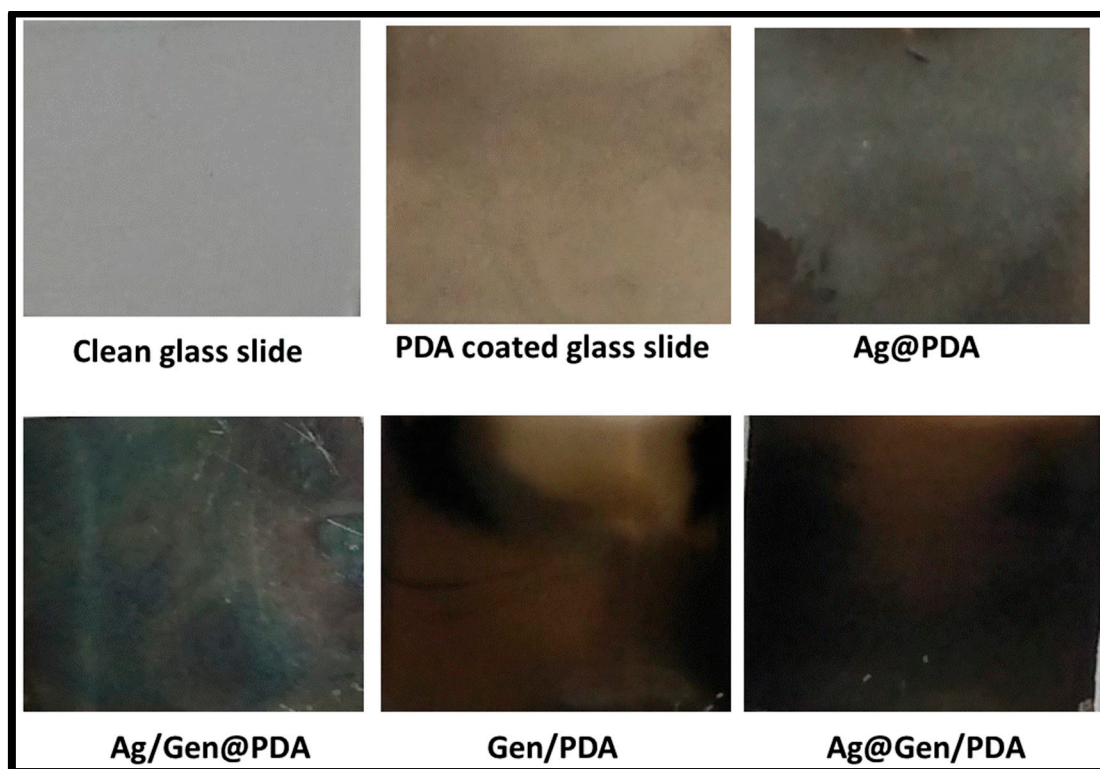

Figure S2: Visual photographs obtained for PDA coatings

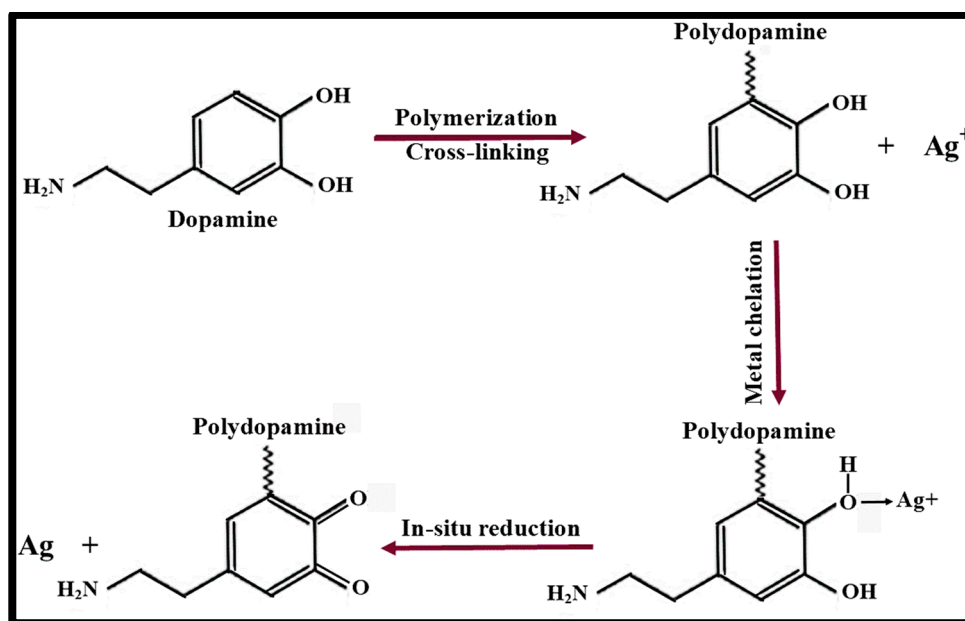

Figure S3: Possible mechanism of AgNPs loading on PDA coated glass substrates.

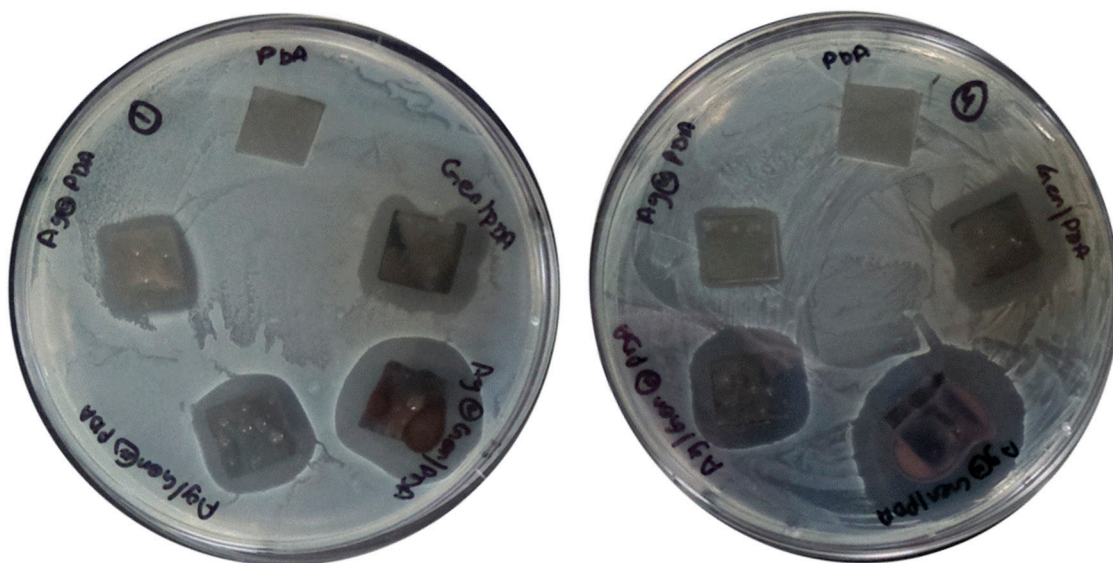

**Figure S4:** Duplicate petri dishes showing zones of inhibition against *S. aureus*. Numbers Petri dishes were numbered while an experiment.

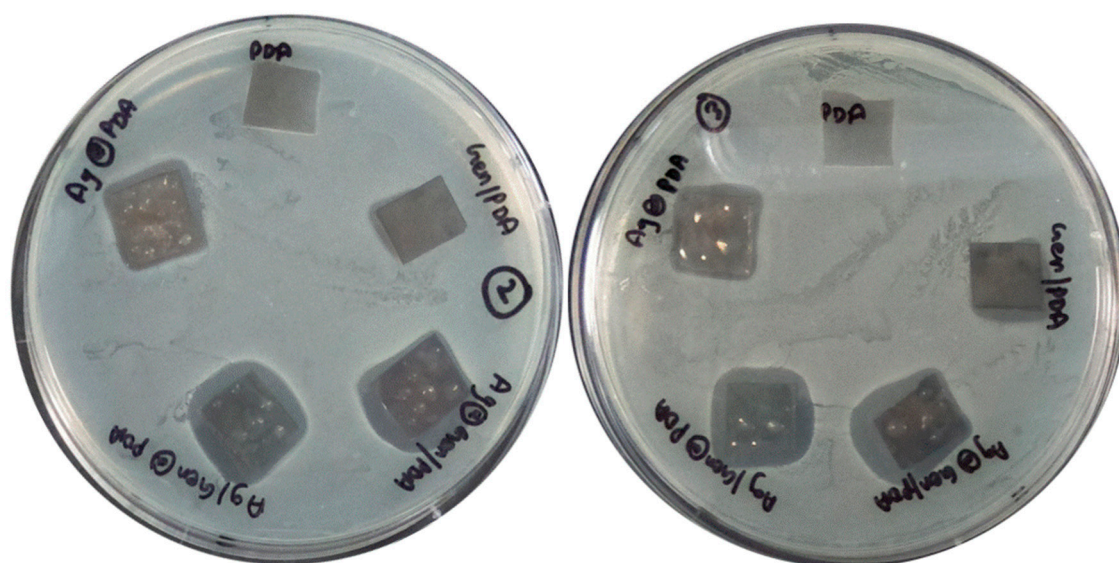

**Figure S5:** Duplicate petri dishes showing zones of inhibition against *E. coli*. Numbers Petri dishes were numbered while an experiment.



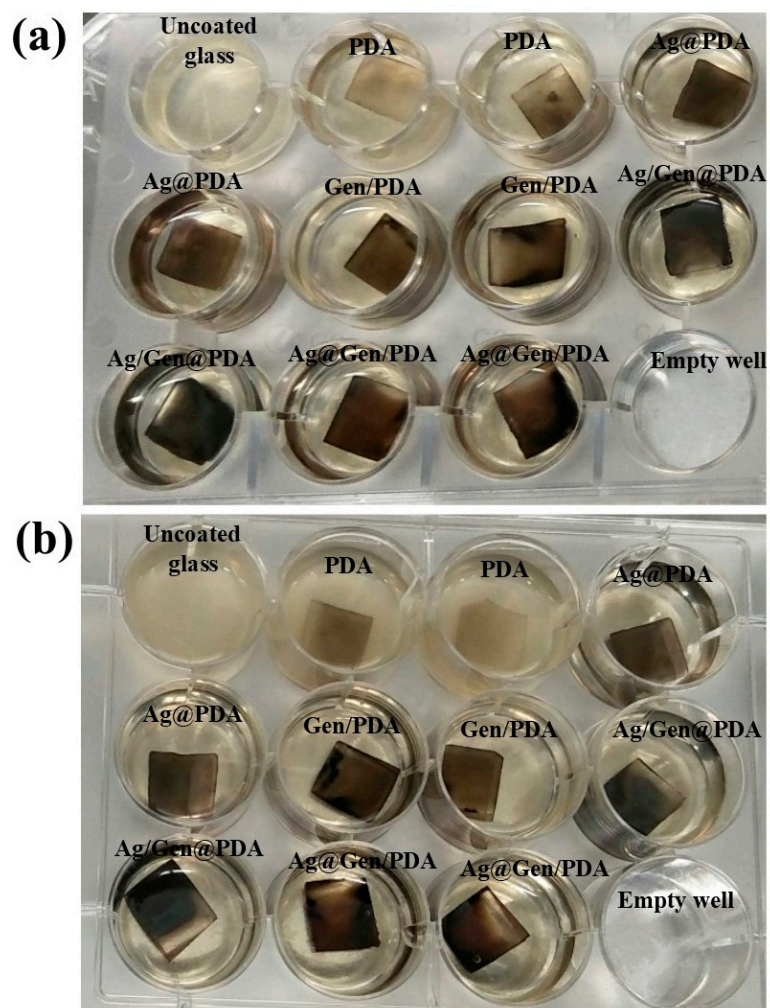

**Figure S6:** 12-well plates showing the solution turbidity for each slide against (a) *S. aureus* and (b) *E. coli* respectively. Measurements were carried out in duplicates.

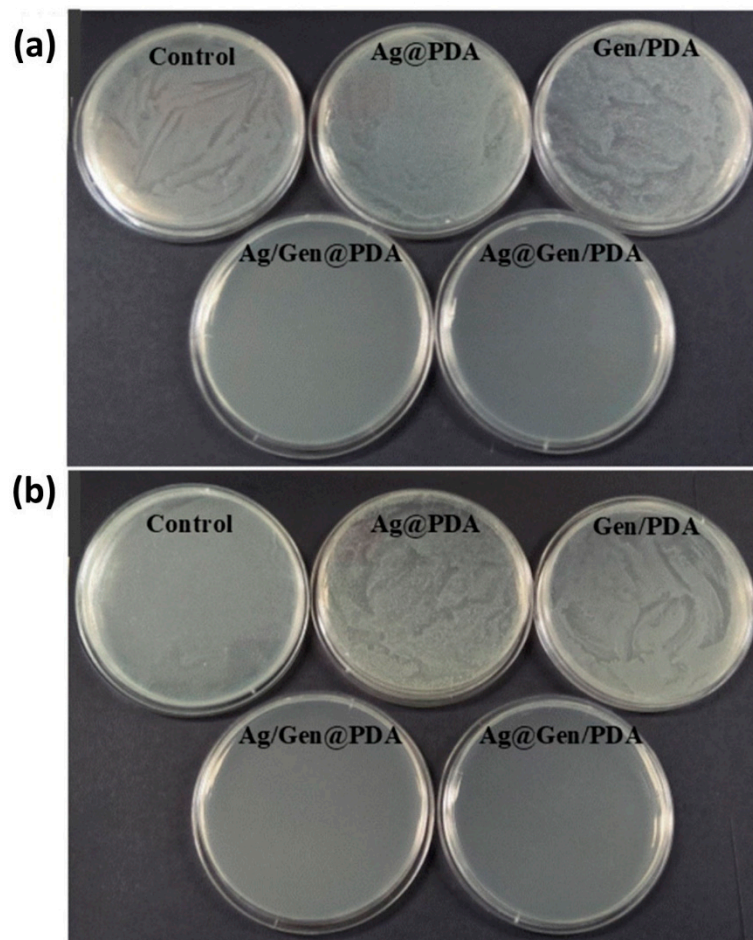

**Figure S7:** Observation of bacterial growth on nutrient agar plates against (a) *S. aureus* and (b) *E. coli*
